# Supplementary material for: Overexpression of Phosphorylated Mammalian Target of Rapamycin Predicts Lymph Node Metastasis and Prognosis of Chinese Patients with Gastric Cancer
Source: Oxford University Press journal article supplement (doi:10.1158/1078-0432.ccr-08-2138), 2009-02-17
Supplement: 10780432ccr082138-sup-supplementary_data.pdf [file 10780432ccr082138-sup-supplementary_data.pdf]

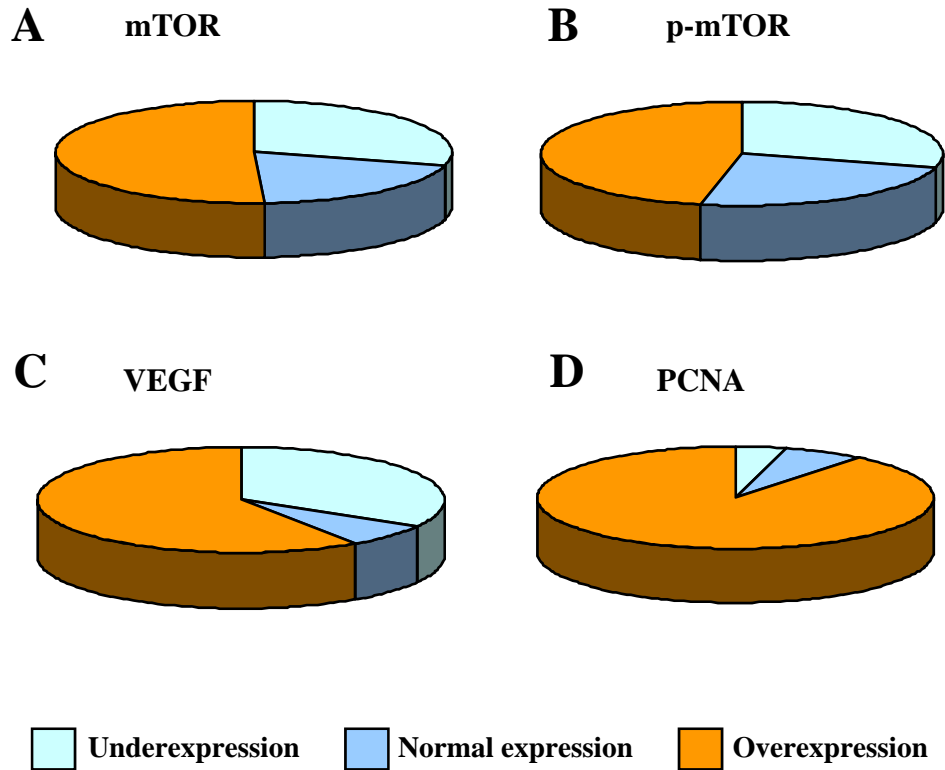

**Supplemental Fig. 1. The expression of mTOR, p-mTOR, VEGF and PCNA in 1072 cases of gastric cancer specimens.** *Underexpression*, tumor with no staining or staining positivity lower than matched normal tissue; *Normal expression*, tumor with staining positivity similar to matched normal tissue; *Overexpression*, tumor with staining positivity higher than normal. Staining positivity was determined according to the percentage score of positive cells and the score of staining intensity.

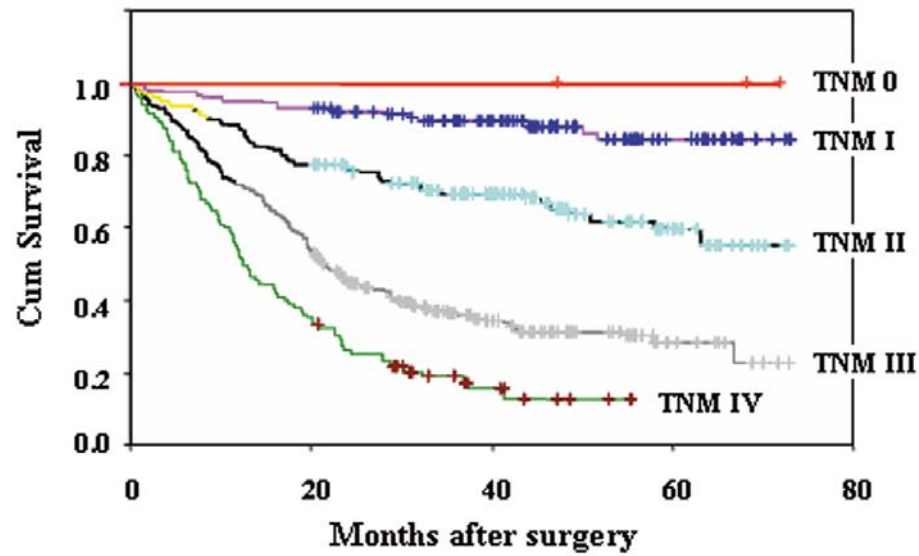

**Supplemental Fig. 2. Kaplan-Meier plot of overall survival durations in the patients according to TNM stages.** The survival durations were significantly worse in patients of advanced stage disease (a median survival of more than 71 months for stage 0) than those with early stage disease: a median survival of 12 months for stage IV disease; 21 months for stage III disease; >52 months for stage II disease, and >66 months for stage I disease.  $P < 0.0001$

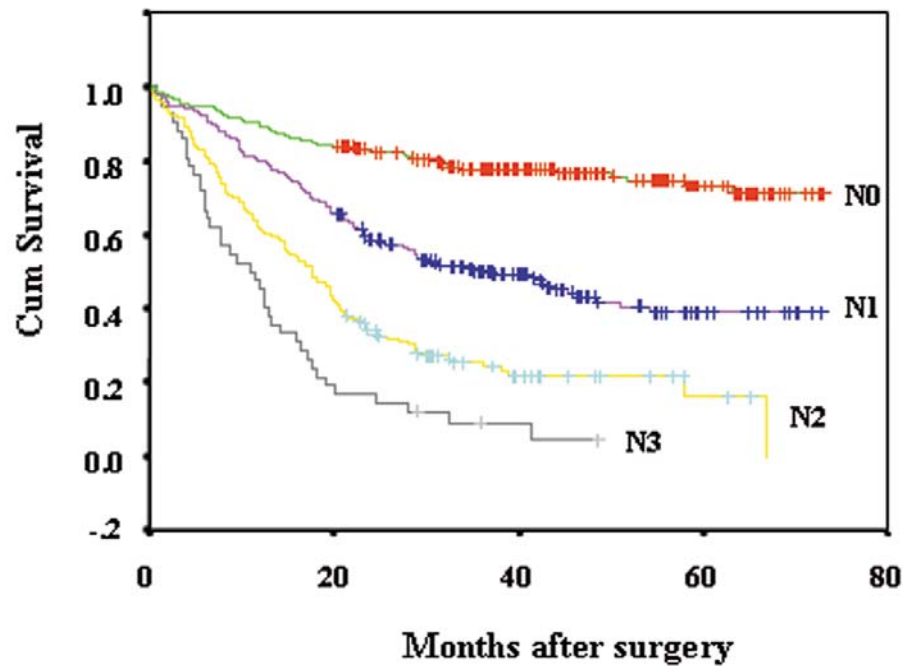

**Supplemental Fig. 3. Kaplan-Meier plot of overall survival durations in the patients according to lymph node metastasis.** The survival durations were significantly worse in patients with an increasing involvement of lymph node metastasis (a median survival of more than 37 months for N2; 18 months for N2-positive tumors; and 11 months for N3) than those with early stage disease ( a median survival of more than 59 months for N0).  $P < 0.0001$

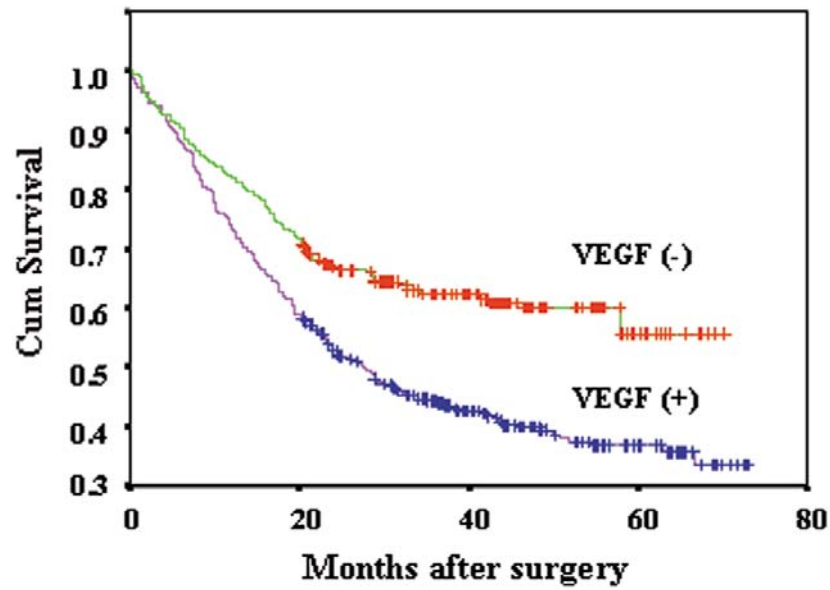

**Supplemental Fig. 4. Kaplan-Meier plot of overall survival durations in the patients according to VEGF expression.** The survival durations were significantly worse in patients with a VEGF overexpression (“+”, a median survival of 28 months) than those without VEGF overexpression (“-”, a median survival of 48 months).  $P < 0.0067$

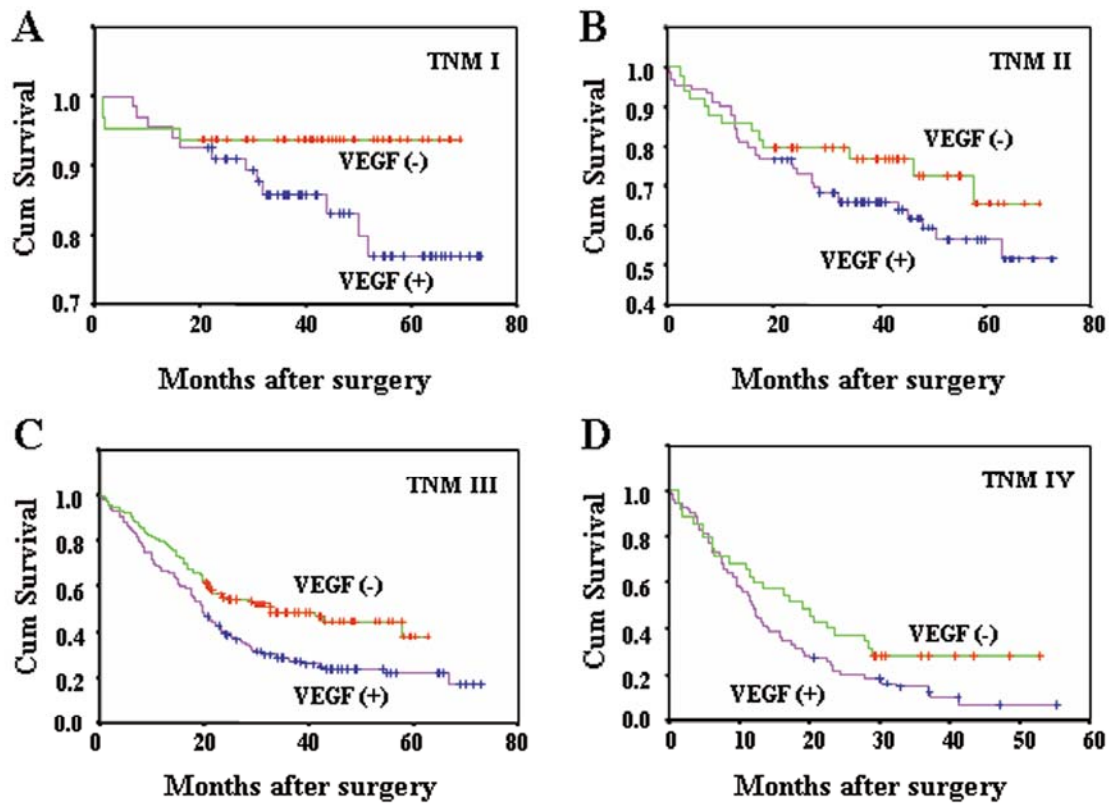

**Supplemental Fig. 5. Kaplan-Meier plot of overall survival durations in the patients with different TNM stages according to VEGF expression .** The survival durations were significantly worse in patients of stage III and IV with VEGF overexpression (“+”, a median survival of 20 months for stage III and 12 months for stage IV) than those of stage III and IV without VEGF overexpression (“-”, a median survival of 33 months for stage III:  $P = 0.001$ ; and 19 months for stage IV:  $P = 0.0500$ ). However, there was no significant difference in survival durations in patients of stage I and II with VEGF overexpression (a median survival of more than 63 months for stage I and more than 50 months for stage II) than those of stage I and II without VEGF overexpression (a median survival of more than 65 months for stage I:  $P = 0.0663$ ; and more than 55 months for stage II:  $P = 0.2243$ ).

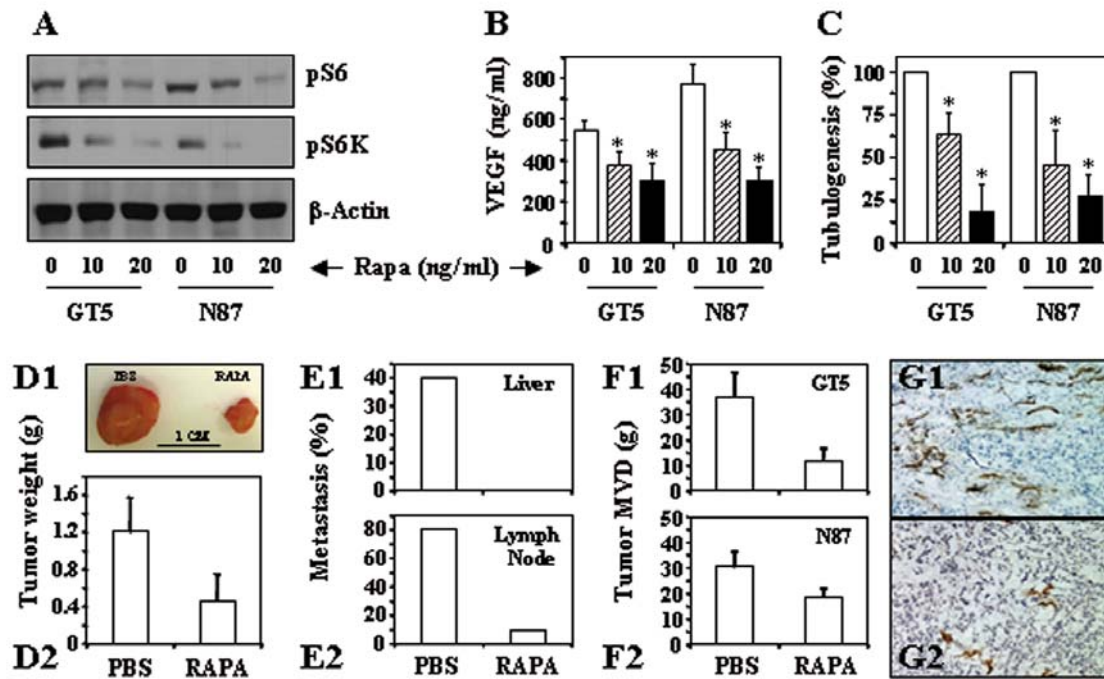

**Supplemental Fig. 6. Inhibition of mTOR suppressed angiogenesis and growth of gastric cancer in vitro and in mouse models.** N87 and GT5 cells were treated with rapamycin (*Rapa*) for 18 hours. Total protein extracts were prepared for Western blot analysis using specific anti-S6 and anti-pS6K antibodies (**A**). Supernatants were collected for analysis of VEGF secretion using ELISA assay (**B**) and angiogenic potential using tubulogenesis assay (**C**). Gastric cancer cells were injected into the subcutis (N87, **D1**) or the wall of stomach (GT5, **D2**) of nude mice. Groups of nude mice (n=5) received treatment of PBS (control) or rapamycin (RAPA, 2.5 mg/kg, *i.p.*) when tumors reached around 4 mm in diameters as described in the Materials and Methods section. Representative subcutaneous tumors (**D1**) and weights of stomach tumors (**D2**) were presented. In the orthotopic model, metastasis to liver (**E1**) and regional lymph nodes (**E2**) were determined and evaluated. The stomach (GT5, **F1**) and subcutaneous (N87, **F2**) tumor tissues were further processed for MVD assessment. Representative photos of MVD in N87 tumors were shown (**G1** & **G2**). \*  $P < 0.05$

**Supplemental Table 1** Correlation between VEGF expression and clinicopathological factors

| Clinicopathological factor   | Total (n) | Positive VEGF Expression |      |        |
|------------------------------|-----------|--------------------------|------|--------|
|                              |           | n                        | %    | P      |
| <b>Age</b>                   |           |                          |      | <0.001 |
| ≤ 60 years                   | 537       | 281                      | 52.3 |        |
| > 60 years                   | 535       | 356                      | 66.5 |        |
| <b>Sex</b>                   |           |                          |      | 0.004  |
| Male                         | 757       | 470                      | 62.1 |        |
| Female                       | 315       | 167                      | 53.0 |        |
| <b>Location</b>              |           |                          |      | 0.002  |
| Cardia                       | 180       | 127                      | 70.6 |        |
| Corpus                       | 329       | 182                      | 55.3 |        |
| Antrum                       | 519       | 297                      | 57.2 |        |
| Whole                        | 44        | 31                       | 70.5 |        |
| <b>Size (Diameter)</b>       |           |                          |      | NS     |
| ≤ 6 cm                       | 825       | 489                      | 59.3 |        |
| > 6 cm                       | 247       | 148                      | 59.9 |        |
| <b>Tumor type</b>            |           |                          |      | <0.001 |
| Adenocarcinoma               | 947       | 595                      | 62.8 |        |
| Mucous carcinoma             | 78        | 24                       | 30.8 |        |
| Ring-like cell carcinoma     | 29        | 9                        | 31.0 |        |
| Other                        | 18        | 7                        | 38.9 |        |
| <b>Differentiation</b>       |           |                          |      | <0.001 |
| Well/moderate                | 616       | 431                      | 68.0 |        |
| Poorly                       | 456       | 206                      | 47.0 |        |
| <b>Gastric wall invasion</b> |           |                          |      | 0.030  |
| T1/T2                        | 312       | 166                      | 53.2 |        |
| T3/T4                        | 760       | 471                      | 62.0 |        |
| <b>Nodal metastasis</b>      |           |                          |      | 0.017  |
| Negative                     | 356       | 195                      | 54.8 |        |
| Positive                     | 716       | 442                      | 61.7 |        |
| <b>TNM stage</b>             |           |                          |      | NS     |
| I/II                         | 427       | 238                      | 55.7 |        |
| III/IV                       | 645       | 399                      | 61.9 |        |
| <b>p53 expression</b>        |           |                          |      | 0.003  |
| Negative                     | 481       | 263                      | 54.7 |        |
| Positive                     | 591       | 374                      | 63.3 |        |
| <b>PCNA expression</b>       |           |                          |      | <0.001 |
| Negative                     | 115       | 49                       | 42.6 |        |
| Positive                     | 957       | 588                      | 61.4 |        |

**Supplemental Table 2** Direct correlation between the expression of VEGF and mTOR in gastric cancer

|                 |          | VEGF Expression |          | Total |
|-----------------|----------|-----------------|----------|-------|
|                 |          | Negative        | Positive |       |
| mTOR Expression | Negative | 296             | 231      | 527   |
|                 | Positive | 139             | 406      | 545   |
| Total           |          | 435             | 637      | 1072  |

Pearson  $\chi^2 = 104.47$ ,  $P < 0.001$



**Supplemental Table 3** Direct correlation between the expression of VEGF and p-mTOR in gastric cancer

|                   |          | VEGF Expression |          | Total |
|-------------------|----------|-----------------|----------|-------|
|                   |          | Negative        | Positive |       |
| p-mTOR Expression | Negative | 288             | 285      | 573   |
|                   | Positive | 147             | 352      | 499   |
| Total             |          | 435             | 637      | 1072  |

Pearson  $\chi^2 = 47.87$ ,  $P < 0.001$

**Supplemental Table 4** Direct correlation between the expression of mTOR and p-mTOR in gastric cancer

|                        |          | <b>p-mTOR Expression</b> |          | Total |
|------------------------|----------|--------------------------|----------|-------|
|                        |          | Negative                 | Positive |       |
| <b>mTOR Expression</b> | Negative | 365                      | 162      | 527   |
|                        | Positive | 208                      | 337      | 545   |
| Total                  |          | 573                      | 499      | 1072  |

Pearson  $\chi^2 = 104.12$   $P < 0.001$

**Supplemental Table 5** Correlation between mTOR expression and MVD

|                            |          | MVD |          |      | Total |
|----------------------------|----------|-----|----------|------|-------|
|                            |          | Low | Moderate | High |       |
| <b>mTOR<br/>Expression</b> | Negative | 260 | 168      | 90   | 527   |
|                            | Positive | 140 | 188      | 226  | 545   |
| Total                      |          | 400 | 356      | 316  | 1072  |

Pearson  $\chi^2 = 94.553$   $P < 0.001$

**Supplemental Table 6** Correlation between p-mTOR expression and MVD

|                              |          | MVD |          |      | Total |
|------------------------------|----------|-----|----------|------|-------|
|                              |          | Low | Moderate | High |       |
| <b>p-mTOR<br/>Expression</b> | Negative | 300 | 191      | 82   | 573   |
|                              | Positive | 100 | 165      | 234  | 499   |
| Total                        |          | 400 | 356      | 316  | 1072  |

Pearson  $\chi^2 = 170.718$ ,  $P < 0.001$

**Supplemental Table 7** Correlation between VEGF expression and MVD

|                    |          | MVD |          |      | Total |
|--------------------|----------|-----|----------|------|-------|
|                    |          | Low | Moderate | High |       |
| VEGF<br>Expression | Negative | 254 | 118      | 63   | 435   |
|                    | Positive | 146 | 238      | 253  | 637   |
| Total              |          | 400 | 356      | 316  | 1072  |

Pearson  $\chi^2 = 151.145$ ,  $P < 0.001$
